# Supplementary material
Source: PubMed Central journal article supplement (PMC2593665)
Supplement: pp.108.128108_1.pdf [file pp.108.128108_1.pdf]

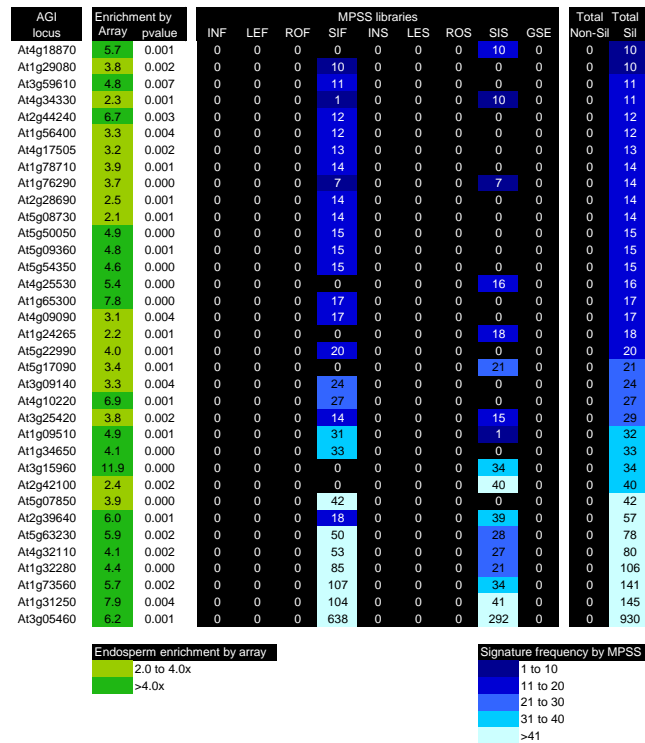

**Figure S1. Heat map showing endosperm preferred genes in MPSS data**

This heat map includes genes with endosperm-preferred expression from our arrays with at least 10 MPSS signatures detected only in silique libraries. The following MPSS libraries were examined: INF (inflorescence - mixed stage, immature buds), LEF (leaves - 21 day), ROF (root - 21 day); SIF (silique - 24-48 h post-fertilization), INS (inflorescence - mixed stage, immature buds), LES (leaves - 21 day), ROS (root - 21 day), SIS (silique - 24 to 48 hr post-fertilization), and GSE (germinating seedling).
