# Supplementary material
Source: PubMed Central journal article supplement (PMC2593665)
Supplement: pp.108.128108_2.pdf [file pp.108.128108_2.pdf]

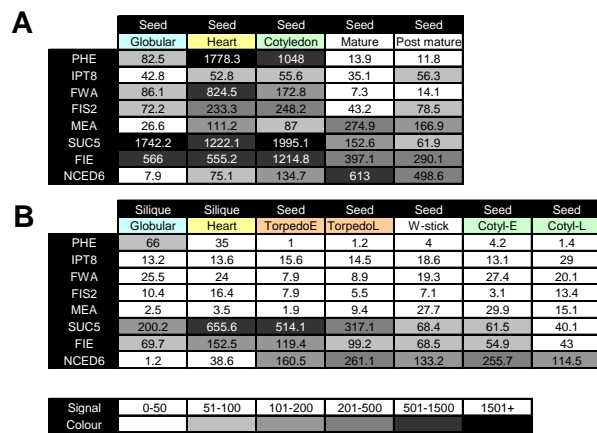

**Figure S2. Heat maps comparing endosperm marker detection in online datasets**

The figure shows A, the normalised signal obtained for endosperm marker genes in the Goldberg and Harada Genechip experiments and B, the normalised signal obtained for endosperm marker genes from the AtGenExpress Genechip seed developmental series. The coloured cells describe the approximate stage of embryo development in the corresponding samples. E and L correspond to early and late, W-stick refers to walking stick and Cotyl is short for Cotyledon.
